# Supplementary material
Source: Royal Society of Chemistry journal article supplement (doi:10.1039/d6ay00629a)
Supplement: d6ay00629a3.pdf [file d6ay00629a3.pdf]

## Supporting Information

### An exonuclease III-assisted CHA dual-cycle amplification strategy for quencher-free fluorescent detection of miRNA

Shi-Qian Liao, Jia-Hao Liu, Xin-Yue Liu, Yi-Ting Liu, Chun-Guang Yang,\* Zhang-Run Xu

Research Center for Analytical Sciences, Northeastern University, Shenyang 110819, P. R. China

E-mail: [yangcg@mail.neu.edu.cn](mailto:yangcg@mail.neu.edu.cn)

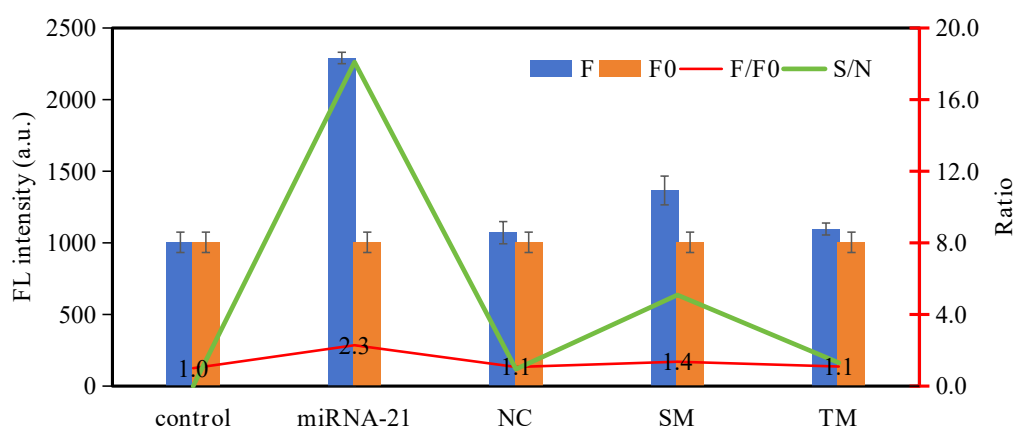

**Figure S1** Specificity of miRNA-21 fluorescence assay detection. The concentrations of miRNA-21 and coexisting substances used were  $1 \text{ nmol L}^{-1}$ . F denotes the fluorescence intensity of target miRNA-21 and coexisting substances.  $F_0$  denotes the fluorescence intensity of blank solution. S/N represents the signal-to-noise ratio ( $S/N = F/\sigma_{\text{blank}}$ ).  $\sigma_{\text{blank}}$  represents the standard deviations of blank solution. The error bars are standard deviations of three repetitive measurements.)

**Table S1 Comparison of this method with other CHA-based detections**

| Target   | Amplification Strategy | Detection Method         | Linear Range                                                             | LOD                      | Ref. |
|----------|------------------------|--------------------------|--------------------------------------------------------------------------|--------------------------|------|
| miRNA-21 | CHA                    | Potentiometric detection | $0.1 \text{ pmol}\cdot\text{L}^{-1} - 10 \text{ nmol}\cdot\text{L}^{-1}$ | $43 \text{ fmol L}^{-1}$ | 1    |

|                                                 |                        |                           |                                                         |                           |           |
|-------------------------------------------------|------------------------|---------------------------|---------------------------------------------------------|---------------------------|-----------|
| sEV-miRNA-1246                                  | turbo-like CHA         | Electrochemical detection | 10 amol·L <sup>-1</sup> - 100 pmol·L <sup>-1</sup>      | 5.24 amol L <sup>-1</sup> | 2         |
| miRNA-122                                       | CHA                    | Fluorescence              | 0.5 - 50 nmol·L <sup>-1</sup>                           | 72 pmol·L <sup>-1</sup>   | 3         |
| miRNA-21                                        | CHA-DNAzyme            | Fluorescence              | 10 pmol·L <sup>-1</sup> - 50 nmol·L <sup>-1</sup>       | 10 pmol·L <sup>-1</sup>   | 4         |
| miRNA-10b                                       | CaCO <sub>3</sub> -CHA | Fluorescence              | 0.01 nmol·L <sup>-1</sup> - 20 nmol·L <sup>-1</sup>     | 5.4 pmol L <sup>-1</sup>  | 5         |
| exosomal miRNA (miRNA-21, miRNA-122, miRNA-375) | Nanoflare&CHA          | Fluorescence              | 0.0195 fmol·L <sup>-1</sup> - 19.5 pmol·L <sup>-1</sup> | 5 amol L <sup>-1</sup>    | 6         |
| miRNA-122                                       | SDA+CHA                | Fluorescence              | 1 pmol·L <sup>-1</sup> - 10 nmol·L <sup>-1</sup>        | 0.24 pmol L <sup>-1</sup> | 7         |
| miRNA-21, miRNA-25, miRNA-93                    | TNA-CHA                | TR-FRET                   | 10 amol·L <sup>-1</sup> - 10 fmol·L <sup>-1</sup>       | 1 amol L <sup>-1</sup>    | 8         |
| miRNA-21                                        | CHA-ExoIII             | Fluorescence              | 500 fmol L <sup>-1</sup> - 10.0 nmol L <sup>-1</sup>    | 13 fmol L <sup>-1</sup>   | This work |

[1] Zhou Q and Tang D P. Catalytic hairpin assembly-mediated surface charge density on the electrode for sensitive potentiometric detection of microRNA-21 in IgA-nephropathy. *Biochemical Engineering Journal*, 2018, 140: 9-16.

[2] Zhu, H., Chen, S., Lan, F., Li, W., Ji, T., Zhang, L., Guo, Y., Pan, W., Luo, S., & Xie, R. Sensitive electrochemical biosensor for rapid detection of sEV-miRNA based turbo-like localized catalytic hairpin assembly. *Analytica Chimica Acta*, 2024, 1311: 342704.

[3] Liu Y, Shen T, Li J, et al. Ratiometric fluorescence sensor for the microRNA determination by catalyzed hairpin assembly. *ACS sensors*, 2017, 2(10): 1430-1434.

[4] Yang L, Wu Q, Chen Y Q, et al. Amplified microRNA detection and intracellular imaging based on an autonomous and catalytic assembly of DNAzyme. *ACS sensors*, 2018, 4(1): 110-117.

[5] Li J B, Yu Q, Li H, et al. CaCO<sub>3</sub> nanoparticle-encapsulated CHA circuits for sensitive fluorescence detection of miRNA in living cells. *Journal of Colloid and*

Interface Science, 2025, 693: 137578.

[6] Zhang X W, Du L, Liu M X, et al. All-in-one nanoflare biosensor combined with catalyzed hairpin assembly amplification for in situ and sensitive exosomal miRNA detection and cancer classification. *Talanta*, 2024, 266: 125145.

[7] Yao Y, Chao M, Yin F, et al. A three-way junction-mediated SDA cascade CHA system for miRNA detection. *Talanta*, 2025, 293: 128033.

[8] Zou, M., Qiu, L., Huang, S., Wu, W., & Liu, J. Digital TNA-CHA-TR-FRET platform for ultrasensitive miRNA detection in serum: A diagnostic tool for early esophageal cancer. *Talanta*, 2026, 298: 129016.
